# Supplementary material for: Binaphthyl platform as starting materials for the preparation of electron rich benzo[g,h,i]perylenes. Application to molecular architectures based on amino benzo[g,h,i]perylenes and carborane combinations
Source: Royal Society of Chemistry journal article supplement (doi:10.1039/c1cc12099a), 2011-01-01
Supplement: c1cc12099a.pdf [file c1cc12099a.pdf]

# **Binaphthyl platform as starting material for the preparation of electron rich benzo[*g,h,i*]perylene. Application to molecular architectures based on amino benzo[*g,h,i*]perylene and carborane combinations**

---

**Grégory Pieters, Anne Gaucher\*, Damien Prim, Thierry Besson, José Giner Planas\*, Francesc Teixidor, Clara Viñas, Mark E. Light, and Michael B. Hursthouse**

---

## Table of contents

|                                                                                          |    |
|------------------------------------------------------------------------------------------|----|
| General                                                                                  | 4  |
| Operating methods.....                                                                   | 4  |
| 5 General .....                                                                          | 4  |
| General procedure for coupling on 1-bromo-2-cyanomethylnaphthalene <b>1</b> .....        | 4  |
| General cyclization procedure for the obtention of aminobenzoperylene <b>5a-5c</b> ..... | 5  |
| General procedure for the synthesis of the compound <b>7</b> and <b>8</b> .....          | 5  |
| Analytical data.....                                                                     | 7  |
| 10 1-bromo-2-cyanomethylnaphthalene <b>1</b> .....                                       | 7  |
| Compound <b>3a</b> .....                                                                 | 7  |
| Compound <b>3b</b> .....                                                                 | 8  |
| Compound <b>3c</b> .....                                                                 | 8  |
| 6-Aminobenzo[g,h,i]perylène <b>5a</b> .....                                              | 9  |
| 15 Compound <b>5b</b> .....                                                              | 9  |
| Compound <b>5c</b> .....                                                                 | 10 |
| Compound <b>7</b> .....                                                                  | 11 |
| Compound <b>8</b> .....                                                                  | 12 |
| NMR Spectra.....                                                                         | 13 |
| 20 <sup>1</sup> H NMR and <sup>13</sup> C NMR of <b>4a</b> .....                         | 13 |
| <sup>1</sup> H NMR of the mixture <b>4b/1'</b> .....                                     | 14 |
| <sup>1</sup> H NMR of the mixture <b>4c/1'</b> .....                                     | 14 |
| <sup>1</sup> H NMR and <sup>13</sup> C NMR of <b>5a</b> .....                            | 15 |
| <sup>1</sup> H NMR and <sup>13</sup> C NMR of <b>5b</b> .....                            | 16 |
| 25 <sup>1</sup> H NMR and <sup>13</sup> C NMR of <b>5c</b> .....                         | 17 |
| <sup>1</sup> H NMR and <sup>13</sup> C NMR of <b>7</b> .....                             | 18 |
| <sup>1</sup> H NMR and <sup>13</sup> C NMR of <b>8</b> .....                             | 19 |
| DFT calculation data .....                                                               | 20 |

[Tapez un texte]

---

|                                          |    |
|------------------------------------------|----|
| Standard orientation for <b>5a</b> ..... | 21 |
| Standard orientation for <b>5b</b> ..... | 22 |
| Standard orientation for <b>5c</b> ..... | 23 |
| X-Ray analysis data.....                 | 25 |
| UV and emission additional data.....     | 29 |

# Operating methods

## General

Unless otherwise noted, all starting materials were obtained from commercial suppliers and used without purification. Petroleum ether was distilled under Argon. NMR spectra were recorded on a 300 MHz and 200 MHz Bruker spectrometer. Chemical shifts were reported in ppm relative to the residual solvent peak (7.26 ppm for CHCl<sub>3</sub>, 5.32 ppm for methylene chloride – d<sub>2</sub>, 3.58 ppm for THF – d<sub>8</sub>) for <sup>1</sup>H spectra and (77.00 ppm for CDCl<sub>3</sub>, 53.8 ppm for methylene chloride – d<sub>2</sub>, 67.4 ppm for THF – d<sub>8</sub>) for <sup>13</sup>C spectra. High Resolution Mass spectroscopy data were recorded on a Autospec Ultima (Waters/Micromass) device with a resolution of 5000 RP at 5%. UV spectra data were recorded on a Agilent 8453 UV-Visible Spectrometry system at 25 °C.

### General procedure for coupling on 1-bromo-2-cyanomethylnaphthalene **1**

To a stirred suspension of 1-bromo-2-cyanomethylnaphthalene **1** (247 mg, 1 mmol), naphthyl-1-boronic acid (344 mg, 2 mmol, 2 eq.), and K<sub>2</sub>CO<sub>3</sub> (414 mg, 3 mmol, 3 eq.) in degassed mixture of toluene (1 mL), absolute ethanol (0.2 mL) and water (0.2 mL) was added PdCl<sub>2</sub>(PPh<sub>3</sub>)<sub>2</sub> (73 mg, 0.1 mmol, 10% mol). The mixture was stirred at 80°C overnight. Water (10 mL) was then added and the aqueous phase extracted with dichloromethane (2x10 mL). The combined organic layers were dried (MgSO<sub>4</sub>), filtered, and concentrated under vacuum. The crude product was purified by flash chromatography on silica gel (PE/DCM: 60/40) to give **3a** as a pale yellow solid (206 mg, 70%).

Using the same procedure, 1-bromo-2-cyanomethylnaphthalene **1** (100 mg, 0.4 mmol), acenaphten-4-boronic acid (158 mg, 0.8 mmol, 2 eq.), K<sub>2</sub>CO<sub>3</sub> (168 mg, 1.2 mmol, 3 eq.) and PdCl<sub>2</sub>(PPh<sub>3</sub>)<sub>2</sub> (29 mg, 0.04 mmol, 10% mol), **3b** was isolated as a mixture, containing debrominated starting material (75/25, 101 mg) after filtration through a pad of silica gel (PE/DCM: 60/40). This yellow solid was used without further purification for the next cyclization step.

Using the same procedure, 1-bromo-2-cyanomethylnaphthalene **1** (247mg, 1 mmol), phenanthren-9-boronic acid (444 mg, 2 mmol, 2 eq.), K<sub>2</sub>CO<sub>3</sub> (414 mg, 3 mmol, 3 eq.) and PdCl<sub>2</sub>(PPh<sub>3</sub>)<sub>2</sub> (73 mg, 0.1 mmol, 10% mol), **3c** was isolated as a mixture, containing debrominated starting material (75/25, 251 mg) after filtration through a pad of silica gel (PE/DCM: 60/40). This cream solid was used without further purification for the next cyclization.

### General cyclization procedure for the obtention of aminobenzoperylene 5a-5c

The nitrile product **3a** (150 mg, 0.51 mmol) was added in stirred polyphosphoric acid (10 mL) under argon. The suspension was stirred at 110°C for 48 h. The resulting mixture was poured into ice (100 g) and basified with 1 M aqueous solution of Na<sub>2</sub>CO<sub>3</sub>. This aqueous layer was then extracted with ethyl acetate (4x50 mL) and the combined organic layers were dried (MgSO<sub>4</sub>), filtered and concentrated under vacuum. The crude product was purified by flash chromatography on silica gel (PE/CH<sub>2</sub>Cl<sub>2</sub>: 40/60) to give 6-aminobenzo-[g,h,i]-perylene **5a** (90 mg, 60%) as a yellow solid.

Using the same procedure starting from the nitrile **3b** (86 mg, 0.27 mmol) compound **5b** was obtained after silica gel flash chromatography purification (PE/EtOAc : 60/40) as an orange solid (25 mg, 30%).

Using the same procedure starting from the nitrile **3c** (216 mg, 0.63 mmol) compound **5c** was obtained after silica gel flash chromatography purification (PE/EtOAc : 70/30) as a yellow solid (95 mg, 44%).

### General procedure for the synthesis of the compound 7 and 8

To a solution of 6-aminobenzo-[g,h,i]-perylene **5a** (50 mg, 0.17 mmol) and triethylamine (70 μL, 0.51 mmol, 3 eq.) in MeCN (1 mL) was added the chloride **6** (54 mg, 0.19 mmol) and KI (9 mg, 30% mol) and the mixture was stirred at reflux for 72 h. Thereafter, saturated aqueous K<sub>2</sub>CO<sub>3</sub> solution (10 mL) was added to the reaction mixture, the aqueous phase was extracted with EtOAc (3x10 mL), and the combined organic phases were dried over MgSO<sub>4</sub>, filtered, and concentrated. Chromatographic separation of the residue obtained on silica gel (PE/EtOAc: 80/20) afforded the compound **7** (36 mg, 40%) as a yellow solid.

[Tapez un texte]

---

Using the same procedure starting from the amine **5c** (40 mg, 0.11 mmol) compound **8** was obtained as a yellow solid (13 mg, 20%). The crude product was purified with PE/EtOAc: 80/20 on preparative TLC.

# Analytical data

---

## 1-bromo-2-cyanomethylnaphthalene 1

5

**mp:** 122 °C.

**<sup>1</sup>H NMR** (δ ppm, CDCl<sub>3</sub>, 300K, 300 MHz): 8.26 (d, *J* = 8.1 Hz, 1H), 7.88 – 7.76 (m, 2H), 7.67 – 7.44  
10 (m, 3H), 4.03 (s, 2H).

**<sup>13</sup>C NMR** (δ ppm, CDCl<sub>3</sub>, 300K, 75 MHz): 133.9, 132.3, 128.6, 128.3, 128.2, 127.8, 127.3, 127.2,  
126.1, 124.2, 117.2, 25.9.

15 Data in accordance with literature.<sup>S1</sup>

## Compound 3a

20

**<sup>1</sup>H NMR** (δ ppm, CDCl<sub>3</sub>, 300K, 300 MHz): 8.04 (d, *J* = 8.5 Hz, 1H), 8.02 (d, *J* = 8.5 Hz, 1H), 8.01 –  
7.93 (m, 2H), 7.76 (d, *J* = 8.5 Hz, 1H), 7.69 – 7.62 (m, 1H), 7.56 – 7.47 (m, 2H), 7.44 (dd, *J* = 7.0, 1.2  
Hz, 1H), 7.37 – 7.25 (m, 2H), 7.19 (d, *J* = 8.2 Hz, 1H), 7.15 (d, *J* = 8.4 Hz, 1H), 3.59 – 3.32 (m, 2H).

---

<sup>S1</sup> N. Aoyagi, T. Izumi *Tetrahedron Lett.* **2002**, 43, 5529

**<sup>13</sup>C NMR** (δ ppm, CDCl<sub>3</sub>, 300K, 75 MHz): 137.1, 135.0, 133.8, 133.2, 133.0, 132.2, 129.0, 128.7, 128.5, 128.1, 128.0, 126.9, 126.8, 126.7, 126.5, 126.5, 126.4, 125.7, 125.6, 125.3, 118.2, 22.2.

Data in accordance with literature.<sup>S2</sup>

5

### Compound 3b

<sup>10</sup> **HRMS (ESI):** *m/z* calculated for C<sub>24</sub>H<sub>17</sub>NNa ([M+Na]<sup>+</sup>): 342.1259 found: 342.1253.

### Compound 3c

<sup>15</sup> **MS (ESI):** *m/z* calculated for C<sub>25</sub>H<sub>17</sub> ([M-CN]<sup>+</sup>): 317.4 found: 317.1.

---

<sup>S2</sup> N. Aoyagi, T. Izumi *Tetrahedron Lett.* **2002**, 43, 5529



## 6-Aminobenzo[g,h,i]perylène 5a

5 **mp:** 256 °C

**<sup>1</sup>H NMR** (δ ppm, CD<sub>2</sub>Cl<sub>2</sub>, 300K, 300 MHz): 8.94 (d, *J* = 8.2 Hz, 1H), 8.92 (d, *J* = 8.2 Hz, 1H), 8.20 – 7.8 (m, 8H), 7.61 (s, 1H), 4.58 (s<sub>br</sub>, 2H).

10 **<sup>13</sup>C NMR** (δ ppm, CD<sub>2</sub>Cl<sub>2</sub>, 300K, 75 MHz): 149.1, 141.3, 134.0, 132.3, 130.8, 130.4, 128.9, 127.6, 126.6, 126.5, 126.3, 126.0, 125.8, 124.9, 124.7, 124.0, 120.6, 120.5, 120.1, 118.6, 117.9, 109.4.

**HRMS (ESI):** *m/z* calculated for C<sub>22</sub>H<sub>14</sub>N ([M+H]<sup>+</sup>): 292.1126 found: 292.1108.

15

## Compound 5b

**mp:** 219 °C

20

**<sup>1</sup>H NMR:** (δ ppm, CD<sub>2</sub>Cl<sub>2</sub>, 300K, 300 MHz): 8.83 (d, *J* = 8.2 Hz, 1H), 8.80 (d, *J* = 8.3 Hz, 1H), 8.07 (d, *J* = 7.3 Hz, 1H), 8.01 – 7.75 (m, 4H), 7.60 (s, 1H), 4.54 (s<sub>br</sub>, 2H), 3.64 (s, 4H).

**<sup>13</sup>C NMR:** (δ ppm, CD<sub>2</sub>Cl<sub>2</sub>, 300K, 75 MHz): 144.5, 143.7, 141.1, 131.3, 129.1, 127.7, 127.2, 126.5, 126.0, 125.9, 124.6, 123.7, 123.2, 121.6, 121.3, 120.6, 120.0, 112.1, 109.2, 31.3, 30.8.

**HRMS (ESI):** *m/z* calculated for C<sub>24</sub>H<sub>16</sub>N [M+H]<sup>+</sup>: 318.1259 found : 318.1283

### Compound 5c

10

**mp:** 229 °C

**<sup>1</sup>H NMR:** (δ ppm, CD<sub>2</sub>Cl<sub>2</sub>, 300K, 300 MHz): 9.48 – 9.30 (m, 1H), 8.96 (d, *J* = 7.7 Hz, 1H), 8.90 (d, *J* = 7.5 Hz, 1H), 8.86 – 8.75 (m, 2H), 8.12 (d, *J* = 7.2 Hz, 1H), 8.04 – 7.84 (m, 4H), 7.73 – 7.61 (m, 3H),  
15 4.74 (s, 2H).

**<sup>13</sup>C NMR:** (δ ppm, CD<sub>2</sub>Cl<sub>2</sub>, 300K, 75 MHz): 143.0, 130.2, 130.1, 130.0, 128.6, 127.9, 127.5, 126.1, 126.2, 125.6, 125.5, 125.1, 124.9, 124.7, 124.4, 123.6, 121.5, 120.4, 120.3, 117.2, 116.5, 115.9, 113.0.

20

**HRMS (ESI):** *m/z* calculated for C<sub>26</sub>H<sub>16</sub>N [M+H]<sup>+</sup>: 342.1283 found : 342.1281

25

## Compound 7

5

**<sup>1</sup>H NMR:** ( $\delta$  ppm, THF-*d*<sub>8</sub>, 300K, 300 MHz): 9.05 (d,  $J = 7.1$  Hz, 1H), 9.00 (d,  $J = 7.2$  Hz, 1H), 8.53  
10 (d,  $J = 9.2$  Hz, 1H), 8.24 – 8.14 (m, 2H), 8.08 (d,  $J = 7.2$  Hz, 1H), 8.00 (t,  $J = 7.8$  Hz, 1H), 7.95 (d,  $J =$   
8.9 Hz, 1H), 7.87 (t,  $J = 7.8$  Hz, 1H), 7.80 (t,  $J = 7.7$  Hz, 3H), 7.49 (s, 1H), 7.37 (m, 3H), 6.43 (d,  $J =$   
10.6 Hz, 1H), 5.79 – 5.45 (m, 1H), 2.16 (s, 3H).

**<sup>13</sup>C NMR:** ( $\delta$  ppm, THF-*d*<sub>8</sub>, 300K, 75 MHz): 140.7, 140.3, 133.4, 132.0, 131.9, 13.1, 130.2, 129.5,  
15 129.2, 128.4, 127.6, 127.5, 127.3, 1126.9, 126.6, 125.8, 121.7, 121.6, 121.2, 119.1, 108.4, 84.0, 77.2,  
61.0, 23.1

**<sup>11</sup>B NMR:** ( $\delta$  ppm, THF-*d*<sub>8</sub>, 300K, 96 MHz): 0 to -15 (m, 8B)

20 **HRMS (EI):**  $m/z$  calculated for C<sub>32</sub>H<sub>31</sub>NB<sub>10</sub> [M]<sup>+</sup>: 540.3499 found : 540.3469

25

## Compound 8

<sup>1</sup>**H NMR:** (δ ppm, CD<sub>2</sub>Cl<sub>2</sub>, 300K, 300 MHz): 9.48 (m, 1H), 9.15 – 8.75 (m, 4H), 8.15 (d, *J* = 4.8 Hz, 1H), 8.11 (d, *J* = 5.4 Hz, 1H), 8.04 (d, *J* = 5.0 Hz, 1H), 7.96 (d, *J* = 7.9 Hz, 2H), 7.91 – 7.78(m, 3H), 7.61-7.52 (m, 2H), 7.45 – 7.30 (m, 3H), 6.46 (m, 1H), 5.27 (m, 1H), 2.21 (s, 3H).

<sup>13</sup>**C NMR:** (δ ppm, CD<sub>2</sub>Cl<sub>2</sub>, 300K, 75 MHz): 141.3, 138.9, 131.5, 131.0, 130.8, 130.7, 129.4, 129.3, 128.9, 128.6, 128.5, 127.7, 127.4, 127.3, 127.1, 126.7, 126.0, 125.9, 125.5, 125.26, 125.1, 122.7, 121.4, 116.9, 109.5, 82.7, 77.4, 61.7, 30.1.

<sup>11</sup>**B NMR:** (δ ppm, CD<sub>2</sub>Cl<sub>2</sub>, 300K, 96 MHz): 5 to -15 (m, 8B)

**HRMS (EI):** *m/z* calculated for C<sub>36</sub>H<sub>33</sub>NB<sub>10</sub> [M]<sup>+</sup>: 584.3712 found : 584.3720

# NMR Spectra

## $^1\text{H}$ NMR and $^{13}\text{C}$ NMR of 4a

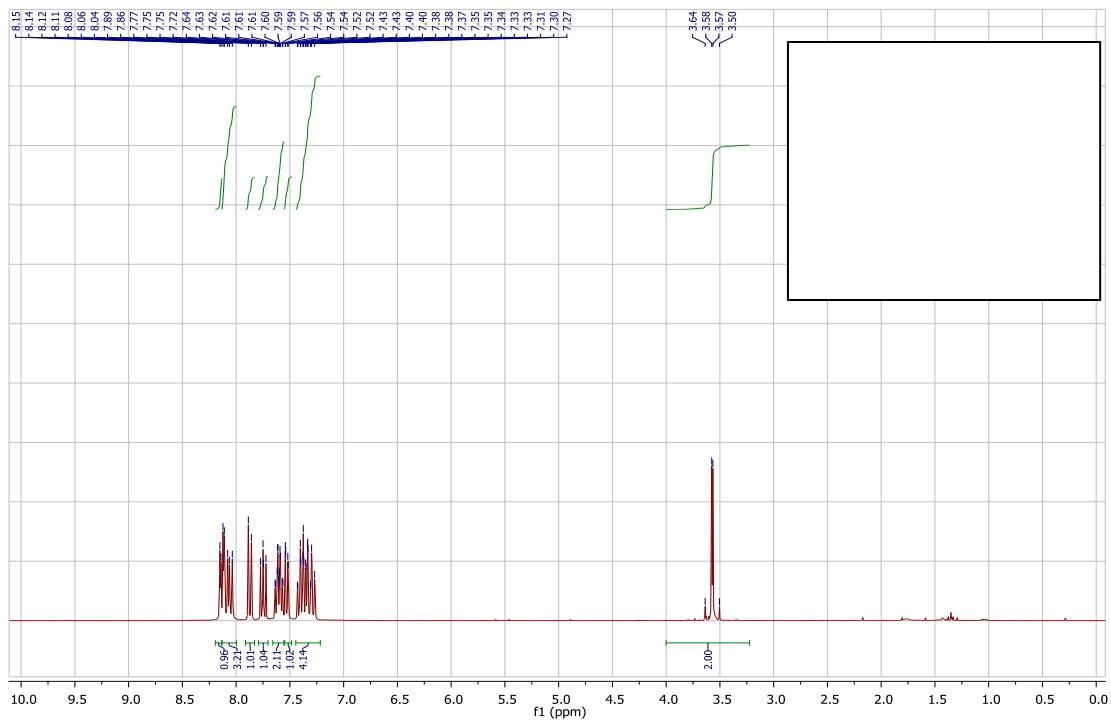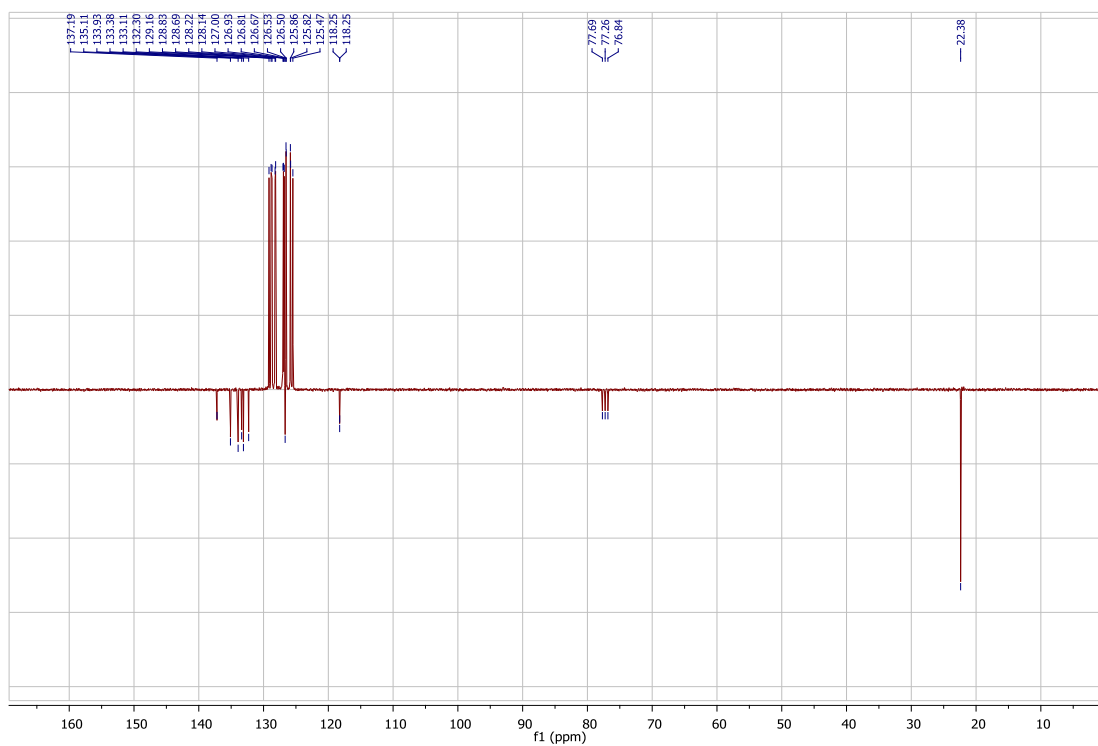

### $^1\text{H}$ NMR of the mixture 4b/1'

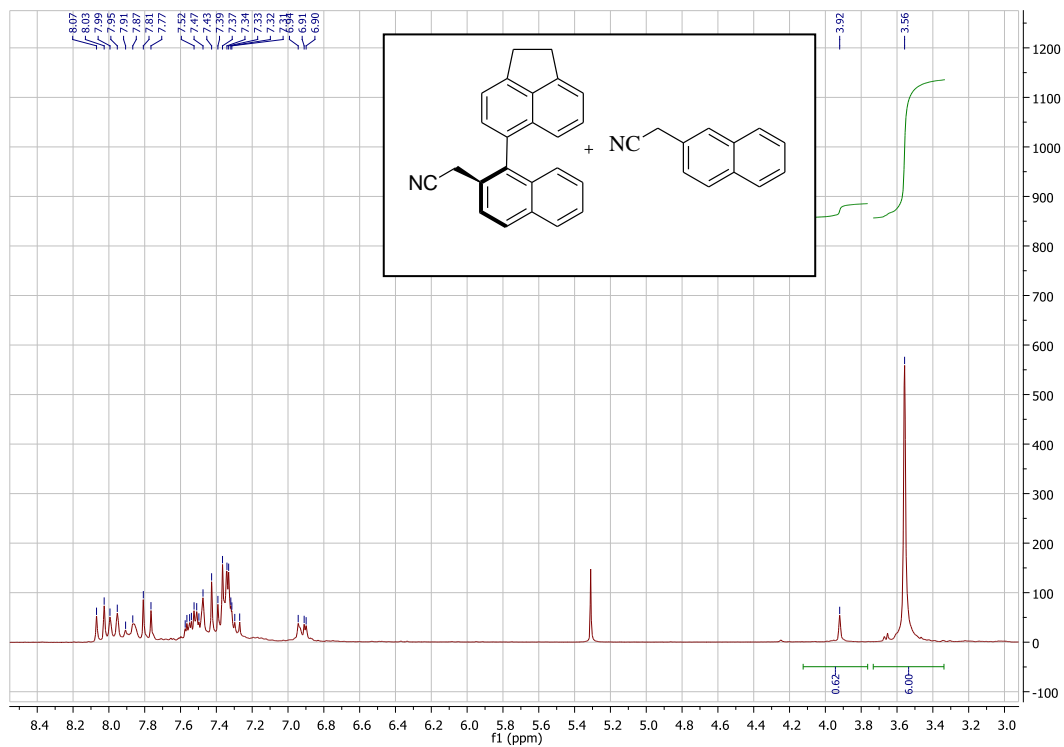

### $^1\text{H}$ NMR of the mixture 4c/1'

5

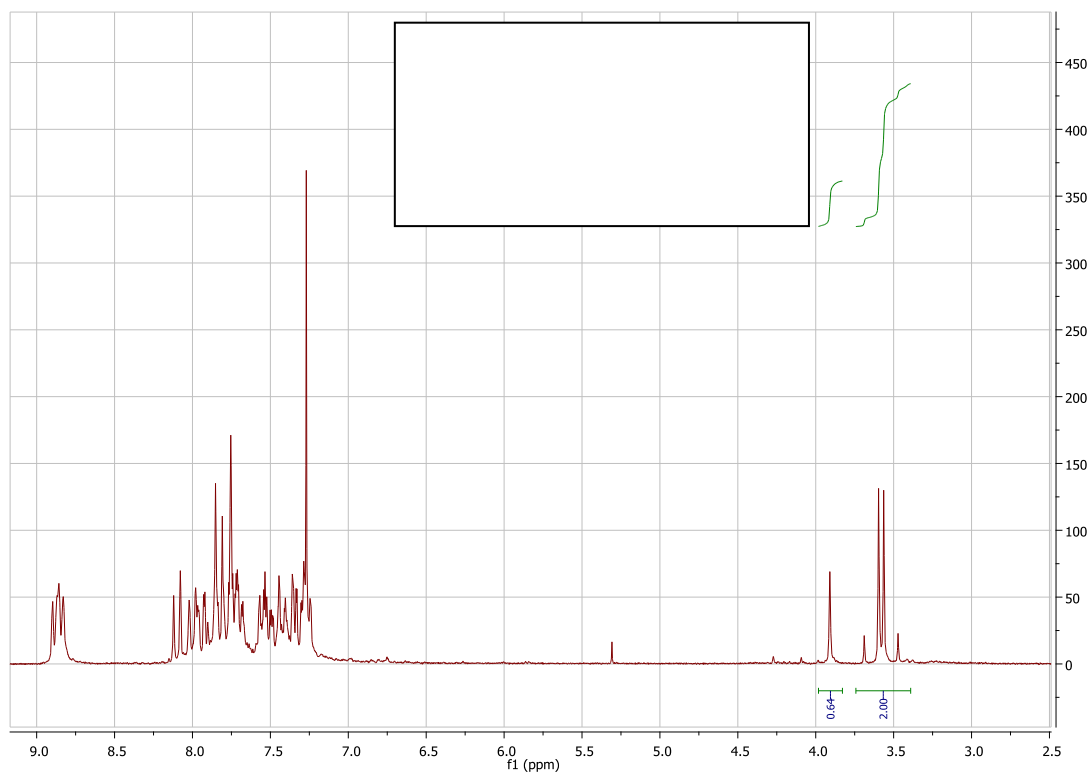

### $^1\text{H}$ NMR and $^{13}\text{C}$ NMR of 5a

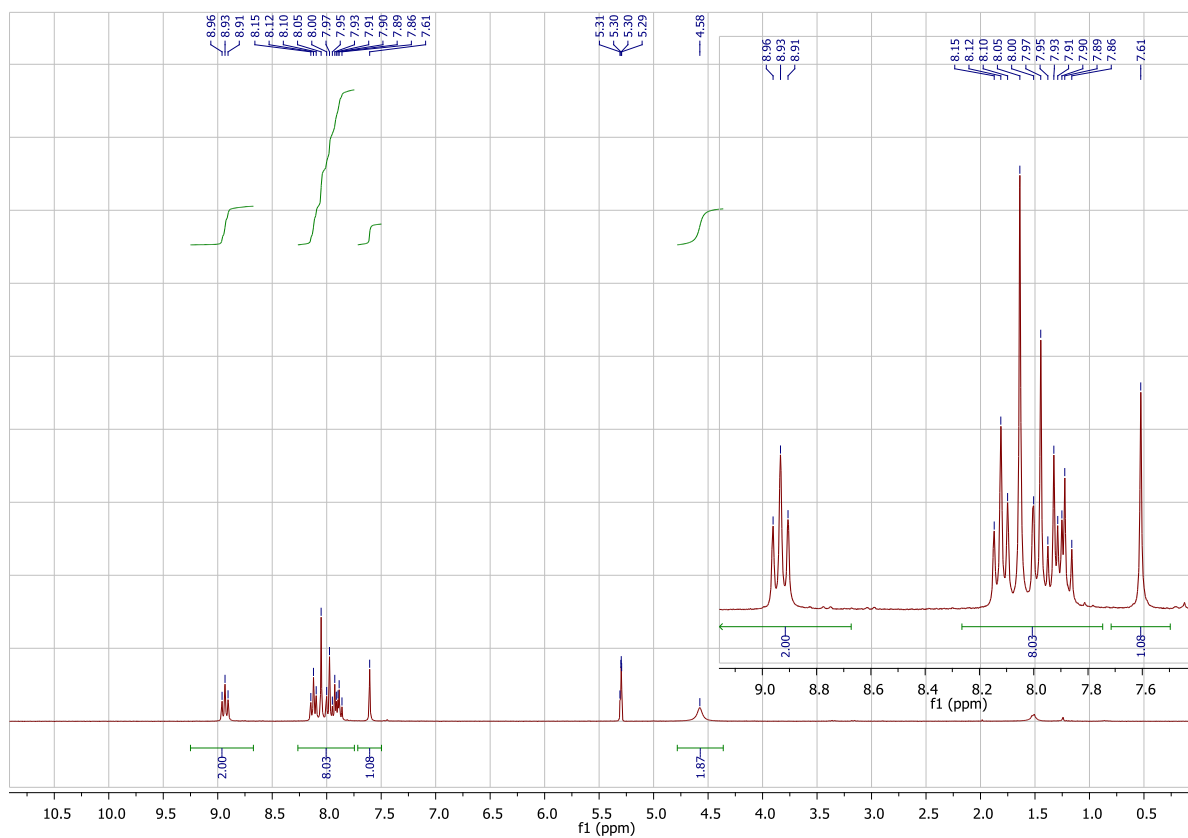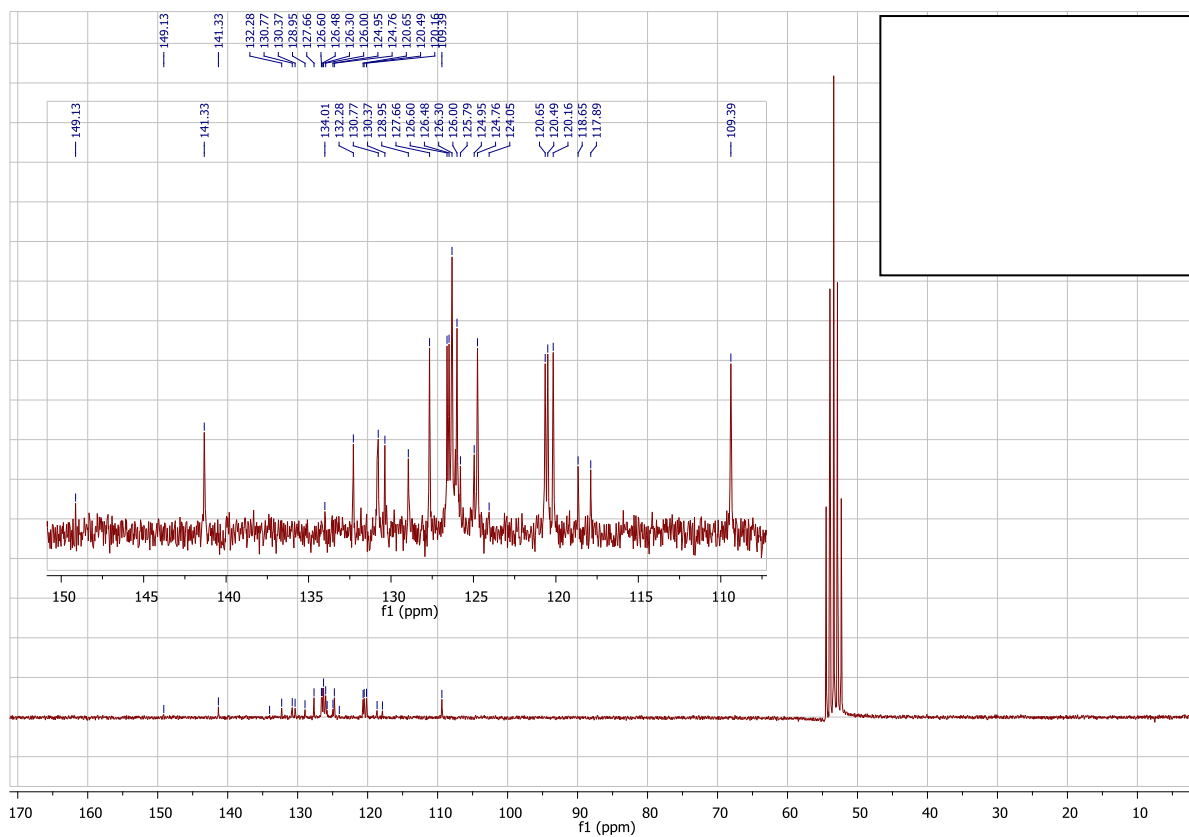

### $^1\text{H}$ NMR and $^{13}\text{C}$ NMR of 5b

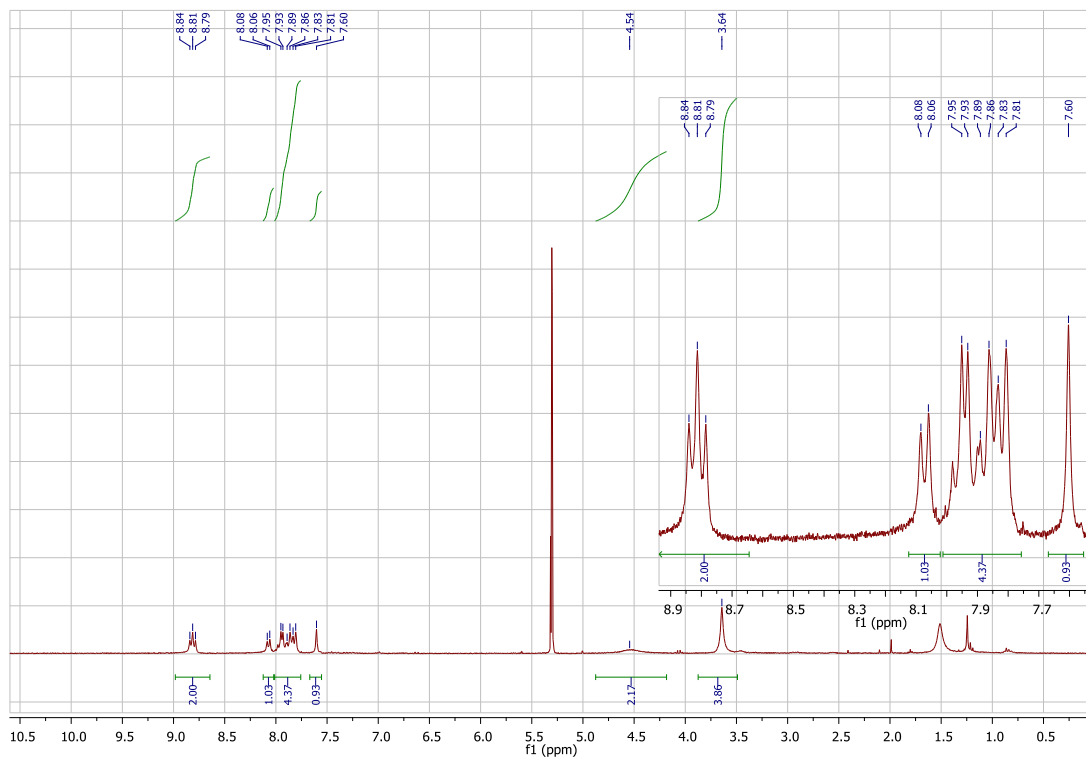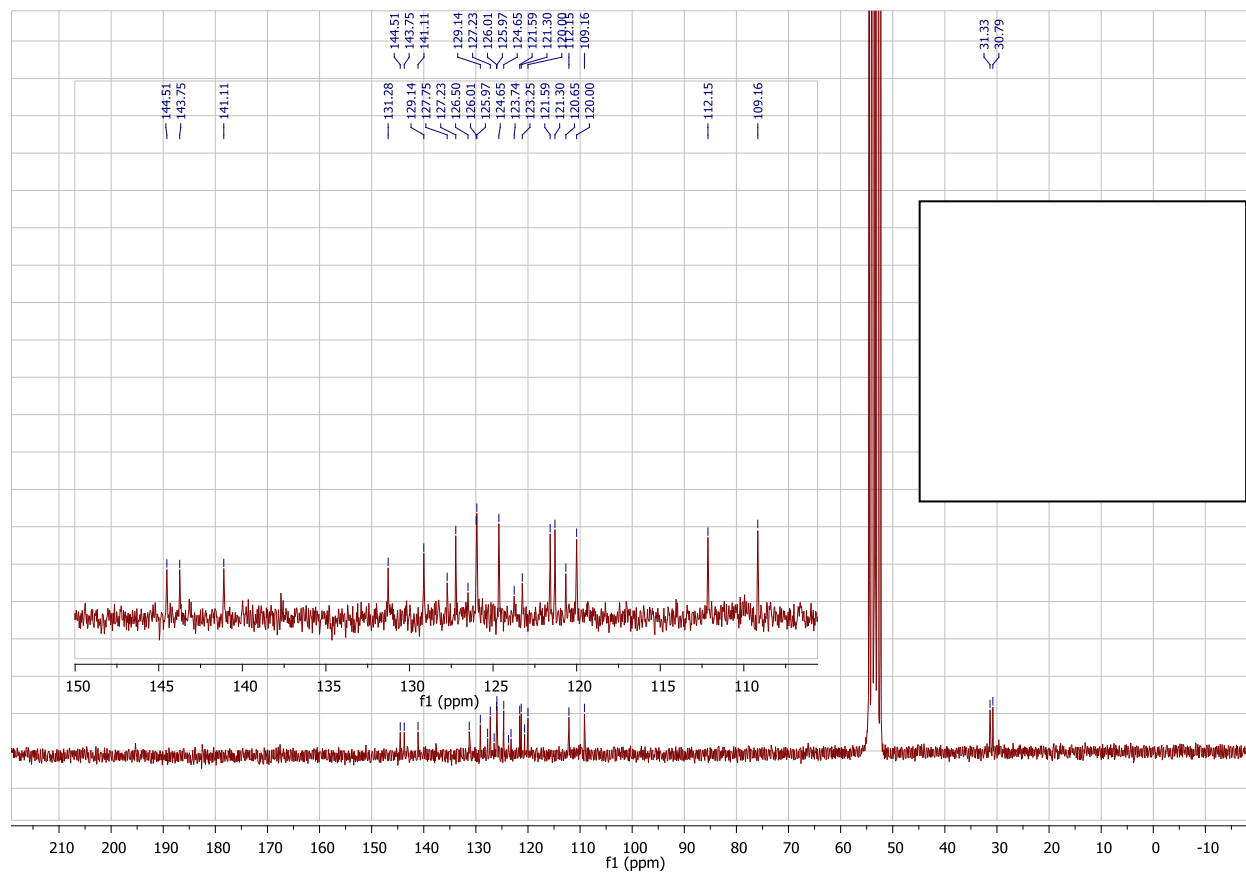





### $^1\text{H}$ NMR and $^{13}\text{C}$ NMR of 7

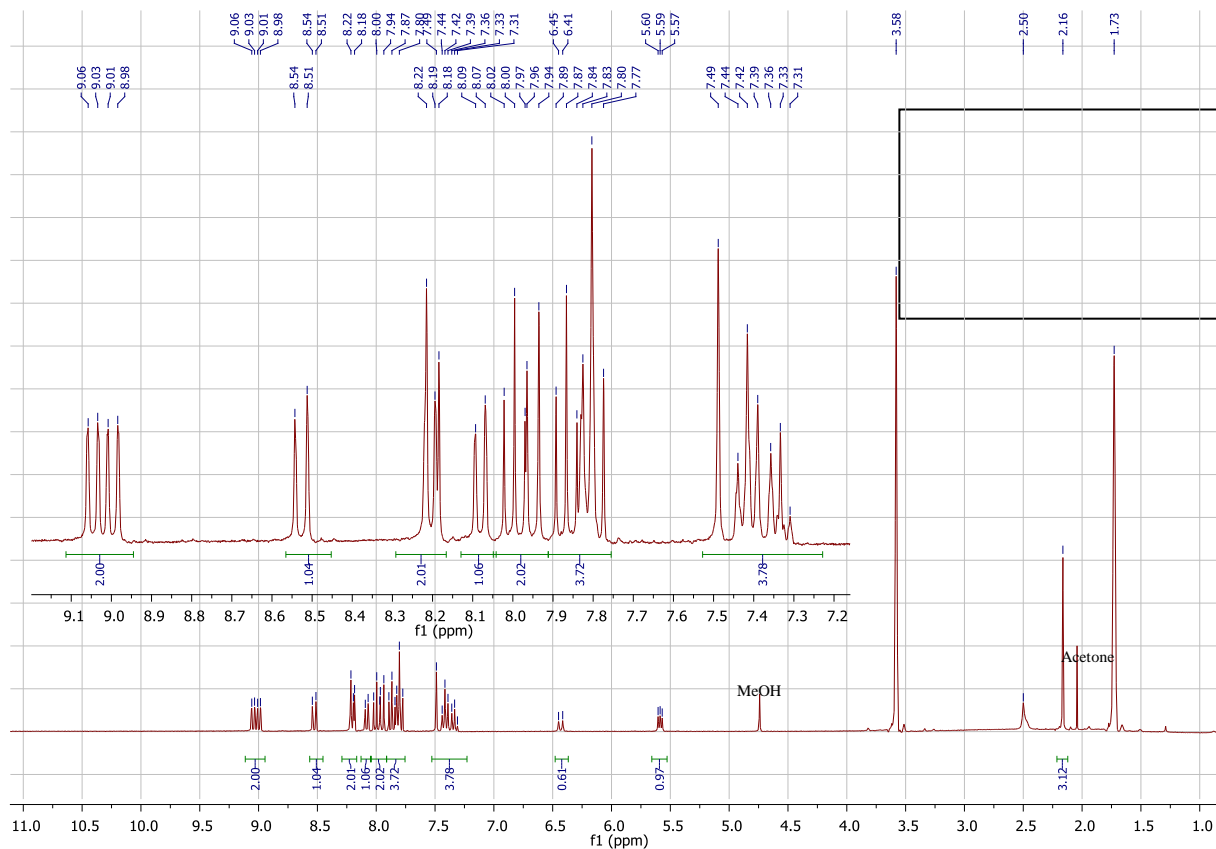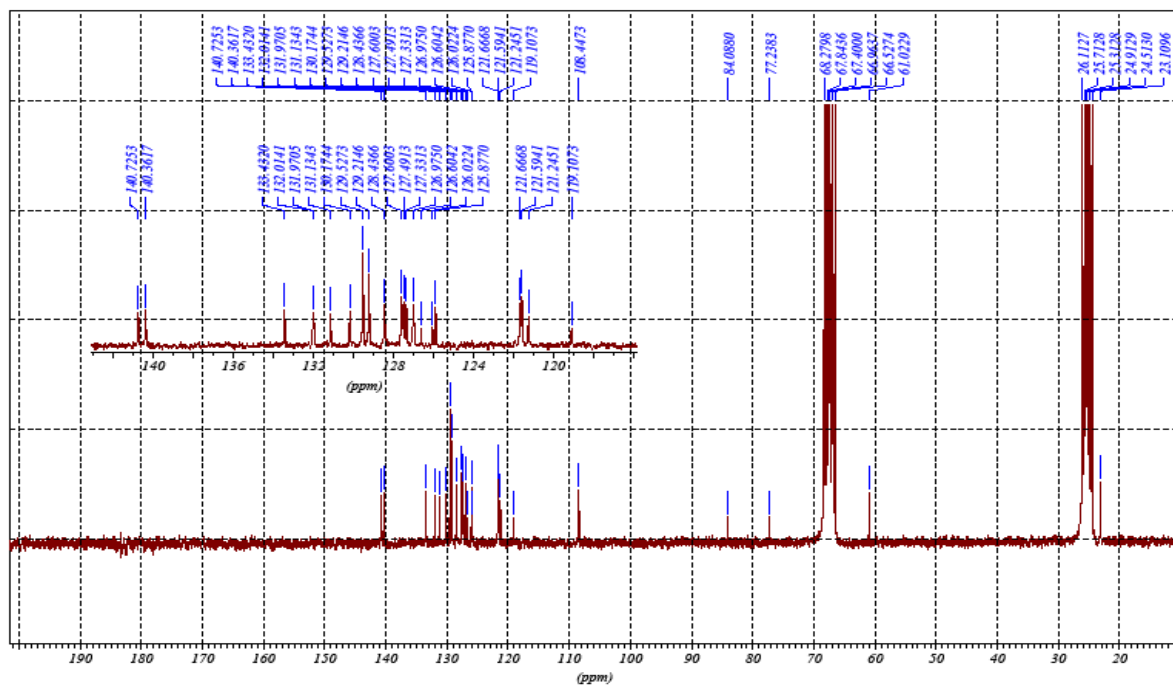

### $^1\text{H}$ NMR and $^{13}\text{C}$ NMR of 8

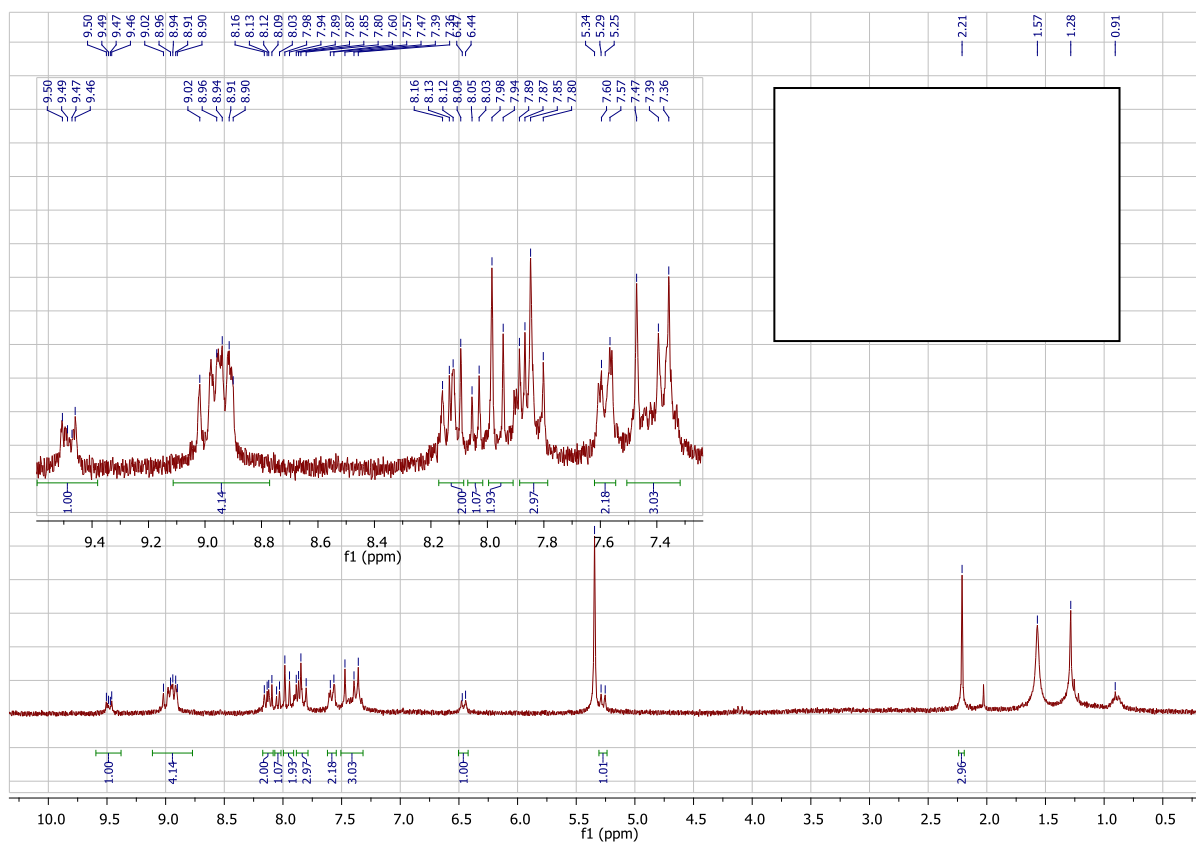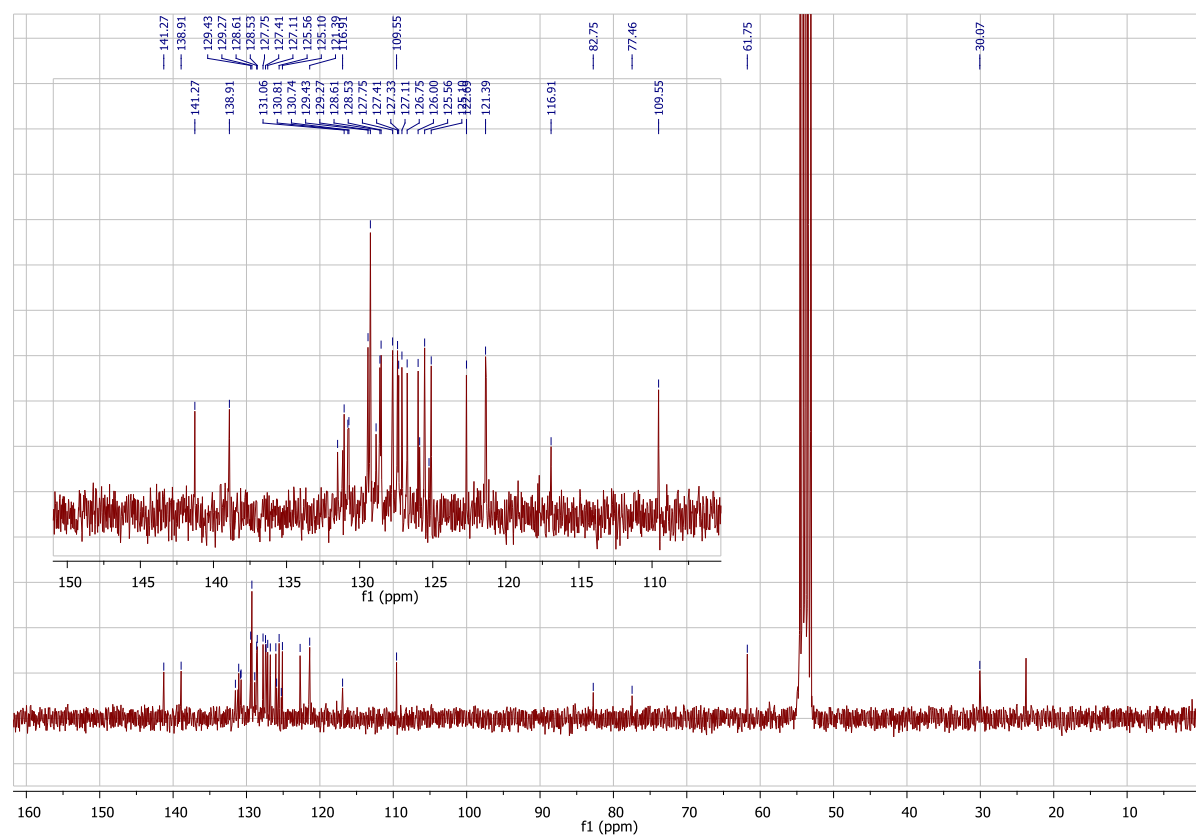

---

## DFT calculation data

---

### Computational details:

All calculations were carried out using Gaussian 03 program [G03]. The geometries were fully optimized using a hybrid density functional [hybrid]; Becke's three-parameter exchange functional combined with the LYP correlation functional (B3LYP) [B3LYP] and with the 6-31G(d) basis set. The vibrational frequencies have been computed to characterize all the stationary point. Note that the optimized Cartesian geometries are given in Angstrom and the total energies (E) expressed in hartree and the frequencies ( $\nu$ ) in  $\text{cm}^{-1}$ .

[G03] Gaussian 03, Revision C.02, Frisch, M. J.; Trucks, G. W.; Schlegel, H. B.; Scuseria, G. E.; Robb, M. A.; Cheeseman, J. R.; Montgomery, Jr., J. A.; Vreven, T.; Kudin, K. N.; Burant, J. C.; Millam, J. M.; Iyengar, S. S.; Tomasi, J.; Barone, V.; Mennucci, B.; Cossi, M.; Scalmani, G.; Rega, N.; Petersson, G. A.; Nakatsuji, H.; Hada, M.; Ehara, M.; Toyota, K.; Fukuda, R.; Hasegawa, J.; Ishida, M.; Nakajima, T.; Honda, Y.; Kitao, O.; Nakai, H.; Klene, M.; Li, X.; Knox, J. E.; Hratchian, H. P.; Cross, J. B.; Bakken, V.; Adamo, C.; Jaramillo, J.; Gomperts, R.; Stratmann, R. E.; Yazyev, O.; Austin, A. J.; Cammi, R.; Pomelli, C.; Ochterski, J. W.; Ayala, P. Y.; Morokuma, K.; Voth, G. A.; Salvador, P.; Dannenberg, J. J.; Zakrzewski, V. G.; Dapprich, S.; Daniels, A. D.; Strain, M. C.; Farkas, O.; Malick, D. K.; Rabuck, A. D.; Raghavachari, K.; Foresman, J. B.; Ortiz, J. V.; Cui, Q.; Baboul, A. G.; Clifford, S.; Cioslowski, J.; Stefanov, B. B.; Liu, G.; Liashenko, A.; Piskorz, P.; Komaromi, I.; Martin, R. L.; Fox, D. J.; Keith, T.; Al-Laham, M. A.; Peng, C. Y.; Nanayakkara, A.; Challacombe, M.; Gill, P. M. W.; Johnson, B.; Chen, W.; Wong, M. W.; Gonzalez, C.; and Pople, J. A.; Gaussian, Inc., Wallingford CT, **2004**.

[hybrid] (a) Parr, R. G.; Yang, W. *Density-Functional Theory of Atoms and Molecules*; Oxford University Press: New York, **1989**. (b) Koch, W.; Holthausen, M. C. *A Chemist's Guide to Density Functional Theory*; Wiley-VCH: New York, **2000**.

[B3LYP] (a) Lee, C.; Yang, W.; Parr, R. G. *Phys. Rev. B* **1988**, *37*, 785. (b) Becke, A. D. *J. Chem. Phys.* 1993, *98*, 5648.

## Standard orientation for 5a

$$E = -901.05610060$$

**Dipole Moment:** 2.2434 Debye

Standard orientation:

5

10

15

20

25

30

35

40

45

| Center<br>Number | Atomic<br>Number | Atomic<br>Type | Coordinates (Angstroms) |           |          |
|------------------|------------------|----------------|-------------------------|-----------|----------|
|                  |                  |                | X                       | Y         | Z        |
| 1                | 6                | 0              | 0.832726                | 4.025330  | 0.000238 |
| 2                | 6                | 0              | -0.370019               | 3.311660  | 0.000268 |
| 3                | 6                | 0              | -0.396721               | 1.910218  | 0.000081 |
| 4                | 6                | 0              | 0.850890                | 1.208485  | 0.000036 |
| 5                | 6                | 0              | 2.076501                | 1.946528  | 0.000089 |
| 6                | 6                | 0              | 2.046324                | 3.354578  | 0.000031 |
| 7                | 6                | 0              | 0.888708                | -0.228127 | 0.000033 |
| 8                | 6                | 0              | 2.138902                | -0.908678 | 0.000079 |
| 9                | 6                | 0              | 3.343346                | -0.134335 | 0.000268 |
| 10               | 6                | 0              | 3.315765                | 1.229824  | 0.000270 |
| 11               | 6                | 0              | -0.337125               | -0.960939 | 0.000017 |
| 12               | 6                | 0              | -0.291313               | -2.380379 | 0.000042 |
| 13               | 6                | 0              | 0.953753                | -3.040757 | 0.000077 |
| 14               | 6                | 0              | 2.155721                | -2.344922 | 0.000053 |
| 15               | 6                | 0              | -1.594983               | -0.278586 | 0.000020 |
| 16               | 6                | 0              | -2.806770               | -1.040253 | 0.000011 |
| 17               | 6                | 0              | -2.726778               | -2.473244 | 0.000016 |
| 18               | 6                | 0              | -1.524274               | -3.115458 | 0.000046 |
| 19               | 6                | 0              | -1.652844               | 1.148189  | 0.000002 |
| 20               | 6                | 0              | -2.912708               | 1.762837  | 0.000112 |
| 21               | 6                | 0              | -4.094266               | 1.014457  | 0.000146 |
| 22               | 6                | 0              | -4.045551               | -0.373059 | 0.000079 |
| 23               | 7                | 0              | 3.348732                | -3.039258 | 0.000106 |
| 24               | 1                | 0              | 0.809680                | 5.111267  | 0.000379 |
| 25               | 1                | 0              | -1.297236               | 3.872396  | 0.000462 |
| 26               | 1                | 0              | 2.983138                | 3.905264  | 0.000025 |
| 27               | 1                | 0              | 4.310504                | -0.626864 | 0.000486 |
| 28               | 1                | 0              | 4.242955                | 1.796456  | 0.000434 |
| 29               | 1                | 0              | 0.968185                | -4.128510 | 0.000150 |
| 30               | 1                | 0              | -3.653228               | -3.041751 | 0.000001 |
| 31               | 1                | 0              | -1.481047               | -4.201550 | 0.000064 |
| 32               | 1                | 0              | -2.992140               | 2.843730  | 0.000199 |
| 33               | 1                | 0              | -5.051958               | 1.526641  | 0.000234 |
| 34               | 1                | 0              | -4.962305               | -0.956976 | 0.000102 |
| 35               | 1                | 0              | 4.240804                | -2.580907 | 0.000654 |
| 36               | 1                | 0              | 3.345831                | -4.044614 | 0.000424 |

## Standard orientation for 5b

$$E = -978.37416122$$

**Dipole Moment:** 2.8738 Debye

Standard orientation:

5

10

15

20

25

30

35

40

45

| Center Number | Atomic Number | Atomic Type | Coordinates (Angstroms) |           |          |
|---------------|---------------|-------------|-------------------------|-----------|----------|
|               |               |             | X                       | Y         | Z        |
| 1             | 6             | 0           | 1.836560                | 2.017342  | 0.000277 |
| 2             | 6             | 0           | 3.270683                | 2.069928  | 0.000470 |
| 3             | 6             | 0           | 4.014920                | 0.926108  | 0.000407 |
| 4             | 6             | 0           | 3.399784                | -0.372385 | 0.000145 |
| 5             | 6             | 0           | 1.971927                | -0.462433 | 0.000000 |
| 6             | 6             | 0           | 1.203189                | 0.748817  | 0.000123 |
| 7             | 6             | 0           | 4.169202                | -1.551928 | 0.000000 |
| 8             | 6             | 0           | 3.550762                | -2.795214 | 0.000435 |
| 9             | 6             | 0           | 2.154453                | -2.890955 | 0.000482 |
| 10            | 6             | 0           | 1.341674                | -1.750486 | 0.000176 |
| 11            | 6             | 0           | -0.219555               | 0.696249  | 0.000000 |
| 12            | 6             | 0           | -1.022937               | 1.874373  | 0.000111 |
| 13            | 6             | 0           | -0.348299               | 3.143248  | 0.000186 |
| 14            | 6             | 0           | 1.042792                | 3.184592  | 0.000000 |
| 15            | 6             | 0           | -0.844860               | -0.586912 | 0.000103 |
| 16            | 6             | 0           | -2.247347               | -0.631928 | 0.000000 |
| 17            | 6             | 0           | -3.061876               | 0.533475  | 0.000000 |
| 18            | 6             | 0           | -2.463818               | 1.763544  | 0.000000 |
| 19            | 6             | 0           | -0.125029               | -1.815155 | 0.000000 |
| 20            | 6             | 0           | -0.877665               | -3.004570 | 0.000234 |
| 21            | 6             | 0           | -2.286870               | -3.020948 | 0.000270 |
| 22            | 6             | 0           | -2.986395               | -1.819346 | 0.000000 |
| 23            | 7             | 0           | -1.066152               | 4.323717  | 0.000399 |
| 24            | 6             | 0           | -4.518342               | 0.091183  | 0.000227 |
| 25            | 6             | 0           | -4.467414               | -1.480726 | 0.000000 |
| 26            | 1             | 0           | 3.757990                | 3.041690  | 0.000587 |
| 27            | 1             | 0           | 5.100673                | 0.979933  | 0.000555 |
| 28            | 1             | 0           | 5.253574                | -1.476856 | 0.000000 |
| 29            | 1             | 0           | 4.149743                | -3.701282 | 0.000695 |
| 30            | 1             | 0           | 1.702656                | -3.877086 | 0.000817 |
| 31            | 1             | 0           | 1.541180                | 4.151871  | 0.000000 |
| 32            | 1             | 0           | -3.079240               | 2.658853  | 0.000155 |
| 33            | 1             | 0           | -0.364932               | -3.960720 | 0.000472 |
| 34            | 1             | 0           | -2.804080               | -3.977119 | 0.000469 |
| 35            | 1             | 0           | -0.585754               | 5.206845  | 0.000214 |
| 36            | 1             | 0           | -2.068904               | 4.342986  | 0.001558 |
| 37            | 1             | 0           | -5.051758               | 0.471115  | 0.878626 |
| 38            | 1             | 0           | -5.051342               | 0.470994  | 0.879389 |
| 39            | 1             | 0           | -4.975017               | -1.896326 | 0.878626 |
| 40            | 1             | 0           | -4.974950               | -1.896154 | 0.878613 |

### Standard orientation for 5c

$$E = -1054.66955572$$

**Dipole Moment:** 1.6918 Debye

Standard orientation:

| Center Number | Atomic Number | Atomic Type | Coordinates (Angstroms) |           |           |          |
|---------------|---------------|-------------|-------------------------|-----------|-----------|----------|
|               |               |             | X                       | Y         | Z         |          |
| 5             | 1             | 6           | 0                       | -1.338448 | -2.338163 | 0.076060 |
| 10            | 2             | 6           | 0                       | -2.640869 | -2.933044 | 0.006865 |
|               | 3             | 6           | 0                       | -3.754872 | -2.164300 | 0.138787 |
|               | 4             | 6           | 0                       | -3.666846 | -0.733312 | 0.174011 |
|               | 5             | 6           | 0                       | -2.382062 | -0.112565 | 0.073442 |
|               | 6             | 6           | 0                       | -1.206896 | -0.925558 | 0.019536 |
| 15            | 7             | 6           | 0                       | -4.814752 | 0.067286  | 0.300347 |
|               | 8             | 6           | 0                       | -4.706056 | 1.449623  | 0.325030 |
|               | 9             | 6           | 0                       | -3.456089 | 2.060238  | 0.205195 |
|               | 10            | 6           | 0                       | -2.283113 | 1.306734  | 0.064745 |
|               | 11            | 6           | 0                       | 0.097089  | -0.342291 | 0.043725 |
| 20            | 12            | 6           | 0                       | 1.259727  | -1.159266 | 0.084211 |
|               | 13            | 6           | 0                       | 1.083186  | -2.566169 | 0.306964 |
|               | 14            | 6           | 0                       | -0.189678 | -3.118855 | 0.259374 |
|               | 15            | 6           | 0                       | 0.211071  | 1.100837  | 0.085030 |
|               | 16            | 6           | 0                       | 1.495761  | 1.709899  | 0.183515 |
| 25            | 17            | 6           | 0                       | 2.691997  | 0.885463  | 0.006411 |
|               | 18            | 6           | 0                       | 2.571937  | -0.529597 | 0.095035 |
|               | 19            | 6           | 0                       | -0.961330 | 1.918397  | 0.098432 |
|               | 20            | 6           | 0                       | -0.819389 | 3.299697  | 0.291974 |
|               | 21            | 6           | 0                       | 0.432970  | 3.878031  | 0.454687 |
| 30            | 22            | 6           | 0                       | 1.577545  | 3.095354  | 0.391869 |
|               | 23            | 6           | 0                       | 3.965026  | 1.474560  | 0.150465 |
|               | 24            | 6           | 0                       | 5.090932  | 0.722965  | 0.436619 |
|               | 25            | 6           | 0                       | 4.963411  | -0.658583 | 0.616400 |
|               | 26            | 6           | 0                       | 3.729394  | -1.265894 | 0.454051 |
| 35            | 27            | 7           | 0                       | 2.159869  | -3.429309 | 0.559351 |
|               | 28            | 1           | 0                       | -2.717394 | -4.016354 | 0.032507 |
|               | 29            | 1           | 0                       | -4.737476 | -2.622769 | 0.211785 |
|               | 30            | 1           | 0                       | -5.786696 | -0.411568 | 0.383306 |
|               | 31            | 1           | 0                       | -5.593996 | 2.064774  | 0.436203 |
| 40            | 32            | 1           | 0                       | -3.407746 | 3.142351  | 0.237178 |
|               | 33            | 1           | 0                       | -0.301117 | -4.193233 | 0.389891 |
|               | 34            | 1           | 0                       | -1.696590 | 3.932874  | 0.346592 |
|               | 35            | 1           | 0                       | 0.517035  | 4.946719  | 0.628342 |
|               | 36            | 1           | 0                       | 2.541004  | 3.573143  | 0.519460 |
| 45            | 37            | 1           | 0                       | 4.069512  | 2.550693  | 0.085203 |
|               | 38            | 1           | 0                       | 6.054066  | 1.210098  | 0.555771 |
|               | 39            | 1           | 0                       | 5.823384  | -1.257823 | 0.901112 |
|               | 40            | 1           | 0                       | 3.642127  | -2.324582 | 0.655690 |
|               | 41            | 1           | 0                       | 1.863999  | -4.303425 | 0.975525 |
| 50            | 42            | 1           | 0                       | 2.912926  | -3.014670 | 1.093706 |

**Table 1.** DFT calculated dihedral angles for compounds **5a** and **5b**

|                     |                                                                                                |                                                                                                  |
|---------------------|------------------------------------------------------------------------------------------------|--------------------------------------------------------------------------------------------------|
| Structure           | 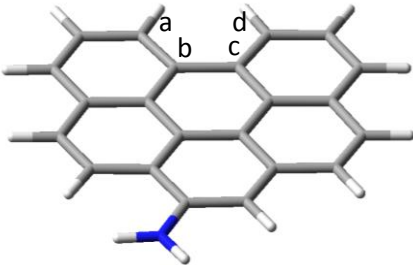<br><b>5a</b> | <br><b>5b</b> |
| Dihedral abcd angle | 0.010                                                                                          | 0.023                                                                                            |

5

10

15

20

25

30

35



# X-Ray analysis data

Data were collected on a Bruker Nonius KappaCCD with a Mo rotating anode generator; standard procedures were followed. During refinement a probable twinning issue was identified; Platon's [REF1] TwinRotMat function gave the following 2 twin law suggestions (1 0 0.48 0 -1 0 0 0 -1 & 0.998 0 0.49 0 -1 0 0.008 0 -0.008). Generation and use of an HKLF5 file reduced the  $R_1$  from ca 19% to ca 6%.

<sup>a</sup>Crystal data for 2010acc1038:  $M = 536.67$ , Monoclinic,  $a = 16.7059(6)$ ,  $b = 12.6255(5)$ ,  $c = 13.7625(4)$  Å,  $\alpha = 90.00^\circ$ ,  $\beta = 101.603(2)^\circ$ ,  $\gamma = 90.00^\circ$ ,  $U = 2843.47(17)$  Å<sup>3</sup>,  $T = 120(2)$  K, space group  $P2(1)/c$ ,  $Z = 4$ ,  $\mu(\text{MoK}\alpha) = 0.066$  mm<sup>-1</sup>, 4996 reflections measured, 4996 unique reflections ( $R_{int} = 0.0000$ ). The final  $R_1$  values were 0.0667 ( $I > 2\sigma(I)$ ). The final  $wR_2(F_2)$  values were 0.1605 ( $I > 2\sigma(I)$ ). The final  $R_1$  values were 0.0956 (all data). The final  $wR_2(F_2)$  values were 0.1787 (all data). The goodness of fit on  $F_2$  was 1.032.

Table 2

| Compound reference                               | 2010acc1038                        |
|--------------------------------------------------|------------------------------------|
| Chemical formula                                 |                                    |
| Formula Mass                                     | 536.67                             |
| Crystal system                                   | Monoclinic                         |
| $a$ / Å                                          | 16.7059(6)                         |
| $b$ / Å                                          | 12.6255(5)                         |
| $c$ / Å                                          | 13.7625(4)                         |
| $\alpha$ / °                                     | 90.00                              |
| $\beta$ / °                                      | 101.603(2)                         |
| $\gamma$ / °                                     | 90.00                              |
| Unit cell volume/ Å <sup>3</sup>                 | 2843.47(17)                        |
| Temperature/ K                                   | 120(2)                             |
| Space group                                      | $P2(1)/c$                          |
| No. of formula units per unit cell, $Z$          | 4                                  |
| Radiation type                                   | MoK $\alpha$                       |
| Absorption coefficient, $\mu$ / mm <sup>-1</sup> | 0.066                              |
| No. of reflections measured                      | 4996                               |
| No. of unique reflections                        | 4996                               |
| No. of independent reflections, $R_{int}$        | 0.0000 (HKLF5, merging suppressed) |
| Final $R_1$ values ( $I > 2\sigma(I)$ )          | 0.0667                             |
| Final $wR_2$ values ( $I > 2\sigma(I)$ )         | 0.1605                             |
| Final $R_1$ values (all data)                    | 0.0956                             |
| Final $wR_2$ values (all data)                   | 0.1787                             |
| Goodness of fit on $F_2$                         | 1.032                              |

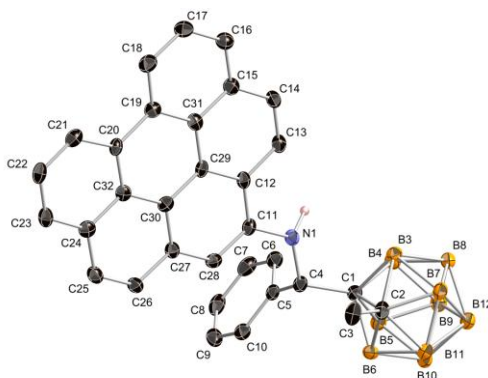

Thermal ellipsoids drawn at the 35% probability level, selected hydrogens omitted for clarity.

[Tapez un texte]

**Table 3.**  $\pi$ - $\pi$  and  $\pi$ -H interactions

|                                                                                                   |            |             |
|---------------------------------------------------------------------------------------------------|------------|-------------|
| RMS deviation for ring system (C11 > C32)                                                         |            | 0.0147Å     |
| Perpendicular distance between mean planes (C11 > C32) and (C11 <sup>i</sup> > C32 <sup>i</sup> ) |            | 3.148(1) Å  |
| C21-H21... (C5 > C10) <sup>i</sup>                                                                | H...Cent   | 2.95Å       |
|                                                                                                   | C-H...Cent | 153°        |
|                                                                                                   | C...Cent   | 3.8221(3) Å |

$i = 1-x, 1-y, -z$

[REF1]. Spek, A. L. (1998) PLATON, A Multipurpose Crystallographic Tool, Utrecht University, Utrecht, The Netherlands.

**Table 4.** Bond lengths [Å] and angles [°].

|         |          |         |          |
|---------|----------|---------|----------|
| N1–C11  | 1.413(4) | C18–C19 | 1.388(4) |
| N1–C4   | 1.446(4) | C19–C31 | 1.430(4) |
| C1–C4   | 1.551(4) | C19–C20 | 1.472(4) |
| C1–C2   | 1.670(4) | C20–C21 | 1.395(4) |
| C1–B4   | 1.704(4) | C20–C32 | 1.416(4) |
| C1–B5   | 1.724(4) | C21–C22 | 1.383(4) |
| C1–B6   | 1.724(4) | C22–C23 | 1.359(4) |
| C1–B3   | 1.732(4) | C23–C24 | 1.403(4) |
| C2–C3   | 1.513(4) | C24–C25 | 1.423(4) |
| C2–B11  | 1.714(4) | C24–C32 | 1.440(4) |
| C2–B7   | 1.715(5) | C25–C26 | 1.348(4) |
| C2–B3   | 1.726(5) | C26–C27 | 1.436(4) |
| C2–B6   | 1.733(4) | C27–C28 | 1.404(4) |
| C4–C5   | 1.524(4) | C27–C30 | 1.411(4) |
| C5–C6   | 1.389(4) | C29–C30 | 1.420(4) |
| C5–C10  | 1.392(4) | C29–C31 | 1.440(4) |
| C6–C7   | 1.375(4) | C30–C32 | 1.426(4) |
| C7–C8   | 1.368(5) | B3–B8   | 1.756(5) |
| C8–C9   | 1.380(5) | B3–B4   | 1.771(5) |
| C9–C10  | 1.399(5) | B3–B7   | 1.774(5) |
| C11–C28 | 1.379(4) | B4–B8   | 1.781(5) |
| C11–C12 | 1.426(4) | B4–B5   | 1.787(5) |
| C12–C29 | 1.417(4) | B4–B9   | 1.791(5) |
| C12–C13 | 1.428(4) | B5–B6   | 1.760(5) |
| C13–C14 | 1.357(4) | B5–B9   | 1.771(5) |
| C14–C15 | 1.432(4) | B5–B10  | 1.784(5) |
| C15–C16 | 1.385(4) | B6–B10  | 1.763(5) |
| C15–C31 | 1.429(4) | B6–B11  | 1.773(5) |
| C16–C17 | 1.375(4) | B7–B8   | 1.762(6) |
| C17–C18 | 1.404(5) | B7–B12  | 1.765(5) |

[Tapez un texte]

|           |           |             |          |
|-----------|-----------|-------------|----------|
| B7–B11    | 1.778(5)  | B9–B12      | 1.785(6) |
| B8–B12    | 1.777(5)  | B10–B11     | 1.774(5) |
| B8–B9     | 1.793(5)  | B10–B12     | 1.786(5) |
| B9–B10    | 1.783(5)  | B11–B12     | 1.769(5) |
| C11–N1–C4 | 121.4(2)  | C8–C9–C10   | 120.2(3) |
| C4–C1–C2  | 115.1(2)  | C5–C10–C9   | 119.4(3) |
| C4–C1–B4  | 125.6(2)  | C28–C11–N1  | 122.1(3) |
| C2–C1–B4  | 110.6(2)  | C28–C11–C12 | 120.0(2) |
| C4–C1–B5  | 121.9(2)  | N1–C11–C12  | 117.8(3) |
| C2–C1–B5  | 110.4(2)  | C29–C12–C11 | 119.3(3) |
| B4–C1–B5  | 62.83(19) | C29–C12–C13 | 118.1(3) |
| C4–C1–B6  | 113.7(2)  | C11–C12–C13 | 122.6(3) |
| C2–C1–B6  | 61.39(18) | C14–C13–C12 | 122.2(3) |
| B4–C1–B6  | 113.2(2)  | C13–C14–C15 | 121.3(3) |
| B5–C1–B6  | 61.42(19) | C16–C15–C31 | 119.4(3) |
| C4–C1–B3  | 119.3(2)  | C16–C15–C14 | 122.1(3) |
| C2–C1–B3  | 60.95(19) | C31–C15–C14 | 118.5(3) |
| B4–C1–B3  | 62.1(2)   | C17–C16–C15 | 121.2(3) |
| B5–C1–B3  | 113.5(2)  | C16–C17–C18 | 120.0(3) |
| B6–C1–B3  | 113.1(2)  | C19–C18–C17 | 121.4(3) |
| C3–C2–C1  | 118.6(2)  | C18–C19–C31 | 118.4(3) |
| C3–C2–B11 | 120.8(3)  | C18–C19–C20 | 122.9(3) |
| C1–C2–B11 | 110.5(2)  | C31–C19–C20 | 118.7(2) |
| C3–C2–B7  | 121.4(3)  | C21–C20–C32 | 118.8(3) |
| C1–C2–B7  | 110.7(2)  | C21–C20–C19 | 122.0(3) |
| B11–C2–B7 | 62.5(2)   | C32–C20–C19 | 119.2(2) |
| C3–C2–B3  | 117.9(3)  | C22–C21–C20 | 121.3(3) |
| C1–C2–B3  | 61.30(18) | C23–C22–C21 | 120.7(3) |
| B11–C2–B3 | 113.5(2)  | C22–C23–C24 | 121.4(3) |
| B7–C2–B3  | 62.1(2)   | C23–C24–C25 | 123.3(3) |
| C3–C2–B6  | 117.5(3)  | C23–C24–C32 | 118.3(3) |
| C1–C2–B6  | 60.85(18) | C25–C24–C32 | 118.3(3) |
| B11–C2–B6 | 61.91(19) | C26–C25–C24 | 122.0(3) |
| B7–C2–B6  | 113.0(2)  | C25–C26–C27 | 121.2(3) |
| B3–C2–B6  | 113.0(2)  | C28–C27–C30 | 120.2(3) |
| N1–C4–C5  | 113.6(2)  | C28–C27–C26 | 121.0(3) |
| N1–C4–C1  | 109.9(2)  | C30–C27–C26 | 118.8(3) |
| C5–C4–C1  | 113.6(2)  | C11–C28–C27 | 121.2(3) |
| C6–C5–C10 | 119.2(3)  | C12–C29–C30 | 120.2(3) |
| C6–C5–C4  | 121.4(3)  | C12–C29–C31 | 120.5(3) |
| C10–C5–C4 | 119.3(3)  | C30–C29–C31 | 119.3(2) |
| C7–C6–C5  | 120.7(3)  | C27–C30–C29 | 119.1(3) |
| C8–C7–C6  | 120.4(3)  | C27–C30–C32 | 120.3(3) |
| C7–C8–C9  | 120.1(3)  | C29–C30–C32 | 120.6(3) |

[Tapez un texte]

---

|             |           |             |           |
|-------------|-----------|-------------|-----------|
| C15–C31–C19 | 119.5(3)  | B10–B6–B11  | 60.2(2)   |
| C15–C31–C29 | 119.4(3)  | C2–B7–B8    | 105.2(2)  |
| C19–C31–C29 | 121.1(3)  | C2–B7–B12   | 105.3(2)  |
| C20–C32–C30 | 121.1(3)  | B8–B7–B12   | 60.5(2)   |
| C20–C32–C24 | 119.5(3)  | C2–B7–B3    | 59.25(19) |
| C30–C32–C24 | 119.4(3)  | B8–B7–B3    | 59.6(2)   |
| C2–B3–C1    | 57.75(18) | B12–B7–B3   | 108.2(3)  |
| C2–B3–B8    | 105.0(2)  | C2–B7–B11   | 58.73(19) |
| C1–B3–B8    | 105.1(2)  | B8–B7–B11   | 108.1(3)  |
| C2–B3–B4    | 104.9(2)  | B12–B7–B11  | 59.9(2)   |
| C1–B3–B4    | 58.19(18) | B3–B7–B11   | 108.1(2)  |
| B8–B3–B4    | 60.7(2)   | B3–B8–B7    | 60.6(2)   |
| C2–B3–B7    | 58.68(19) | B3–B8–B12   | 108.5(3)  |
| C1–B3–B7    | 105.1(2)  | B7–B8–B12   | 59.8(2)   |
| B8–B3–B7    | 59.9(2)   | B3–B8–B4    | 60.1(2)   |
| B4–B3–B7    | 108.3(2)  | B7–B8–B4    | 108.4(3)  |
| C1–B4–B3    | 59.75(19) | B12–B8–B4   | 108.2(3)  |
| C1–B4–B8    | 105.2(3)  | B3–B8–B9    | 108.4(3)  |
| B3–B4–B8    | 59.3(2)   | B7–B8–B9    | 108.0(3)  |
| C1–B4–B5    | 59.13(18) | B12–B8–B9   | 60.0(2)   |
| B3–B4–B5    | 108.7(2)  | B4–B8–B9    | 60.1(2)   |
| B8–B4–B5    | 107.7(3)  | B5–B9–B10   | 60.3(2)   |
| C1–B4–B9    | 105.0(2)  | B5–B9–B12   | 108.1(3)  |
| B3–B4–B9    | 107.8(3)  | B10–B9–B12  | 60.1(2)   |
| B8–B4–B9    | 60.3(2)   | B5–B9–B4    | 60.20(19) |
| B5–B4–B9    | 59.3(2)   | B10–B9–B4   | 108.2(2)  |
| C1–B5–B6    | 59.30(18) | B12–B9–B4   | 107.4(3)  |
| C1–B5–B9    | 105.1(2)  | B5–B9–B8    | 107.8(2)  |
| B6–B5–B9    | 107.7(3)  | B10–B9–B8   | 107.8(3)  |
| C1–B5–B10   | 105.4(2)  | B12–B9–B8   | 59.6(2)   |
| B6–B5–B10   | 59.6(2)   | B4–B9–B8    | 59.6(2)   |
| B9–B5–B10   | 60.2(2)   | B6–B10–B11  | 60.2(2)   |
| C1–B5–B4    | 58.04(18) | B6–B10–B9   | 107.1(2)  |
| B6–B5–B4    | 107.5(2)  | B11–B10–B9  | 107.6(2)  |
| B9–B5–B4    | 60.4(2)   | B6–B10–B5   | 59.52(19) |
| B10–B5–B4   | 108.3(3)  | B11–B10–B5  | 107.7(2)  |
| C1–B6–C2    | 57.76(17) | B9–B10–B5   | 59.5(2)   |
| C1–B6–B5    | 59.28(17) | B6–B10–B12  | 107.5(2)  |
| C2–B6–B5    | 105.8(2)  | B11–B10–B12 | 59.6(2)   |
| C1–B6–B10   | 106.3(2)  | B9–B10–B12  | 60.0(2)   |
| C2–B6–B10   | 105.6(2)  | B5–B10–B12  | 107.5(2)  |
| B5–B6–B10   | 60.8(2)   | C2–B11–B12  | 105.1(2)  |
| C1–B6–B11   | 105.3(2)  | C2–B11–B6   | 59.57(18) |
| C2–B6–B11   | 58.52(19) | B12–B11–B6  | 107.8(3)  |
| B5–B6–B11   | 108.7(3)  | C2–B11–B10  | 106.0(2)  |

[Tapez un texte]

---

|             |           |
|-------------|-----------|
| B12–B11–B10 | 60.5(2)   |
| B6–B11–B10  | 59.6(2)   |
| C2–B11–B7   | 58.81(19) |
| B12–B11–B7  | 59.7(2)   |
| B6–B11–B7   | 108.2(2)  |
| B10–B11–B7  | 108.5(3)  |
| B7–B12–B11  | 60.4(2)   |
| B7–B12–B8   | 59.6(2)   |
| B11–B12–B8  | 107.8(3)  |
| B7–B12–B9   | 108.2(3)  |
| B11–B12–B9  | 107.7(3)  |
| B8–B12–B9   | 60.4(2)   |
| B7–B12–B10  | 108.5(2)  |
| B11–B12–B10 | 59.9(2)   |
| B8–B12–B10  | 108.3(3)  |
| B9–B12–B10  | 59.9(2)   |

[Tapez un texte]

## UV and emission additional data

Comparison between the available UV spectrum for benzo[*ghi*]perylene<sup>S2</sup> and that for the new amino benzo[*ghi*]perylene **5a** is shown in Figure 1.

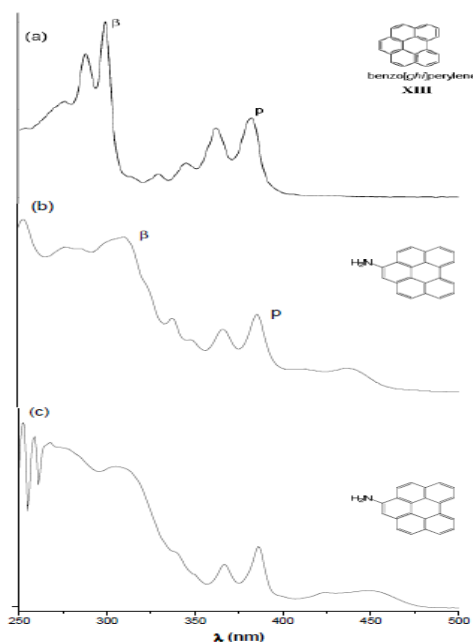

**Figure 1.** UV absorbance spectra for (a) benzo[*ghi*]perylene in acetonitrile<sup>S2</sup>; (b) amino benzo[*ghi*]perylene ( $\text{CH}_2\text{Cl}_2$ ,  $10^{-5}\text{M}$ ). (c) amino benzo[*ghi*]perylene (THF,  $10^{-5}\text{M}$ ).

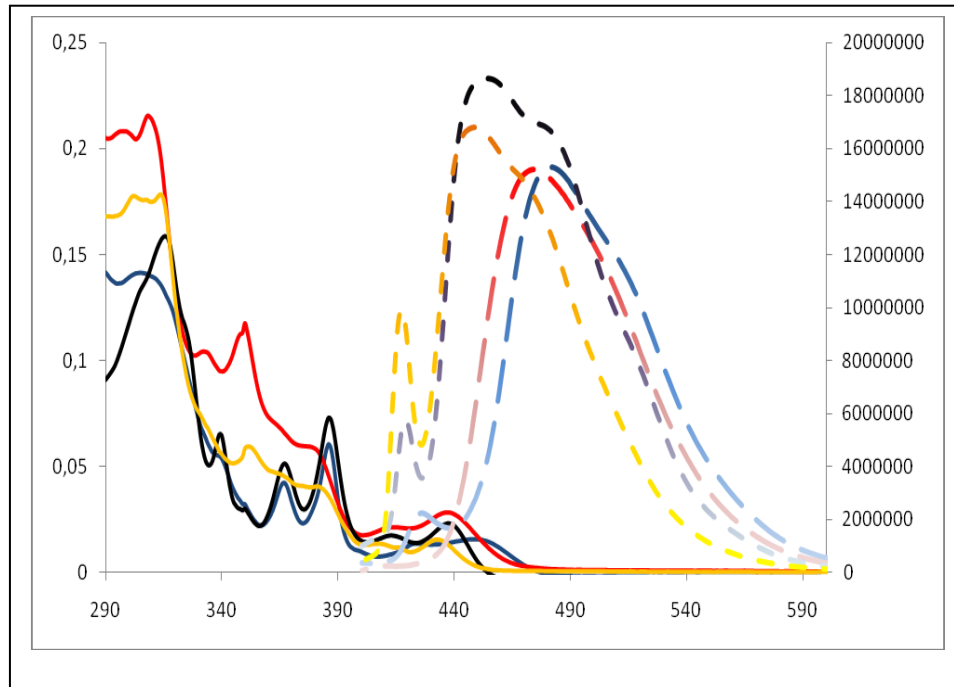

**Figure 2.** UV absorbance ( $C = 10^{-5}$ ) and emission ( $C = 0.5 \times 10^{-5}$ ) spectra for **5a**, **5c**, **7** and **8** in THF.

<sup>S2</sup> J. W. McClaine, X. Zhang, M. J. Wornat, *Journal of Chromatography A* **2006**, *1127*, 137.
